# Supplementary material for: Efficient photodegradation of 2-chloro-4-nitrophenol over Fe-doped BiOCl nanosheets with oxygen vacancy
Source: Royal Society of Chemistry journal article supplement (doi:10.1039/d1cy00807b), 2021-01-01
Supplement: d1cy00807b1.pdf [file d1cy00807b1.pdf]

## Supporting Information

### **Efficient Photodegradation of 2-Chloro-4-Nitrophenol over Fe-Doped BiOCl Nanosheets with Oxygen Vacancy**

Haoyuan Wu,<sup>1</sup> Xiangming Liu,<sup>2</sup> Hua Xu,<sup>2,\*</sup> Xinmin Yang,<sup>1</sup> and Jinhua Ye<sup>1,3,\*</sup>

<sup>1</sup>TJU-NIMS International Collaboration Laboratory, School of Materials Science and Engineering, Tianjin University, Tianjin 300072, P.R. China;

<sup>2</sup>School of Chemistry and Environmental Engineering, Wuhan Institute of Technology, Wuhan 430205, P.R. China;

<sup>3</sup>International Center for Materials Nanoarchitectonics (WPI-MANA), National Institute for Materials Science (NIMS), Tsukuba 305-0047, Japan.

Corresponding email: [XU.Hua@wit.edu.cn](mailto:XU.Hua@wit.edu.cn), [Jinhua.YE@nims.go.jp](mailto:Jinhua.YE@nims.go.jp)

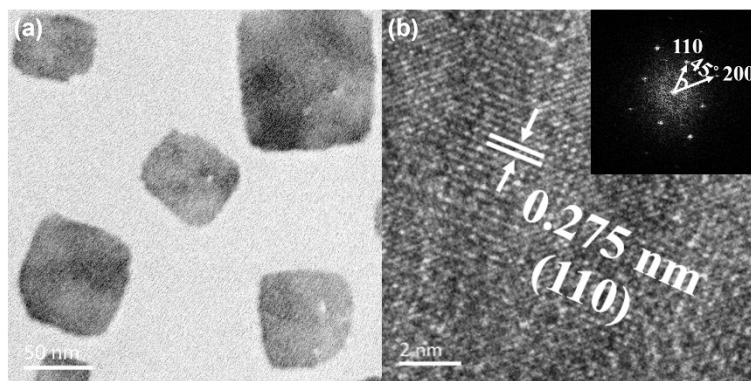

**Figure S1** (a) TEM image, (b) HRTEM image and FFT pattern (inset) of BOC.

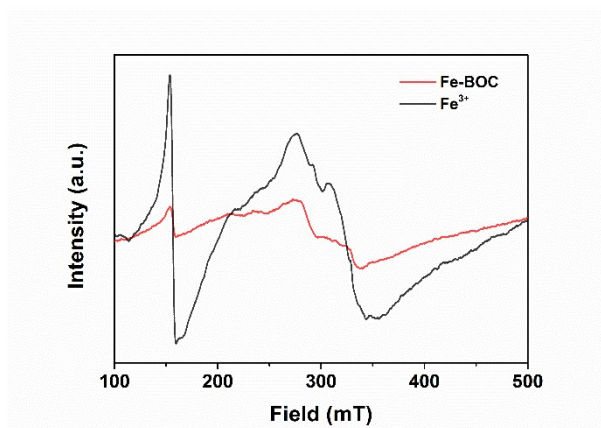

**Figure S2** EPR spectra of Fe-BOC and  $\text{Fe}^{3+}$  standard sample.

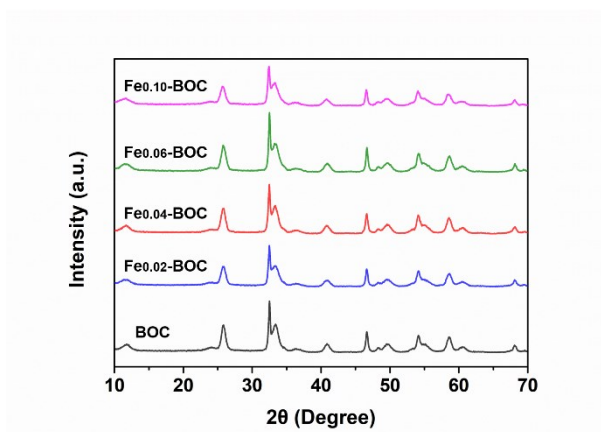

**Figure S3** XRD patterns of Fe-doped  $\text{BiOCl}$  with various concentration of Fe.

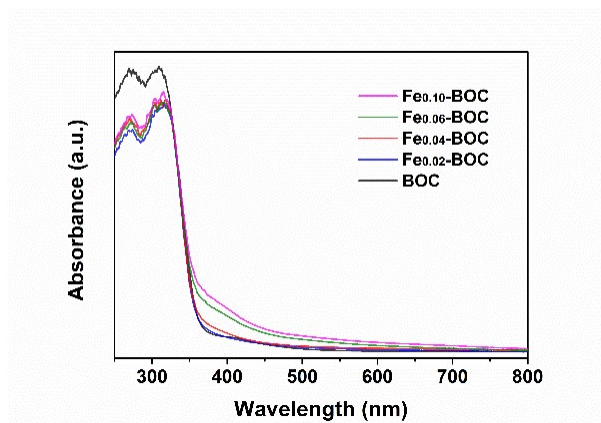

**Figure S4** UV-visible diffuse reflectance spectra of Fe-doped BiOCl with various concentration of Fe.

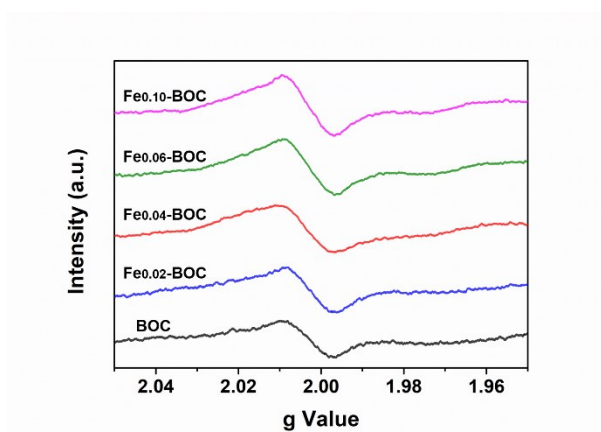

**Figure S5** EPR spectra to detect the concentration of oxygen vacancy in BiOCl and Fe-doped BiOCl with various concentration of Fe.

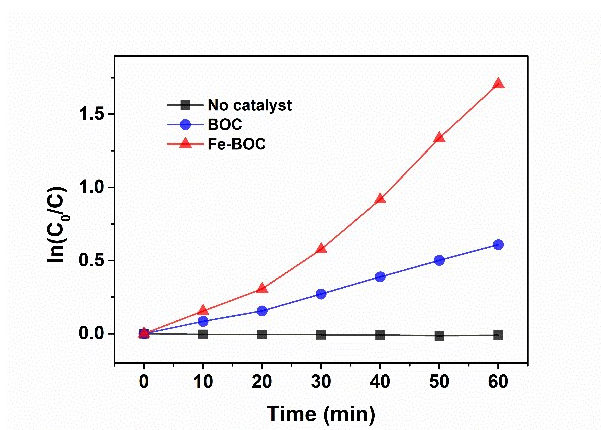

**Figure S6** Corresponding kinetic curves of prepared BOC and Fe-BOC.

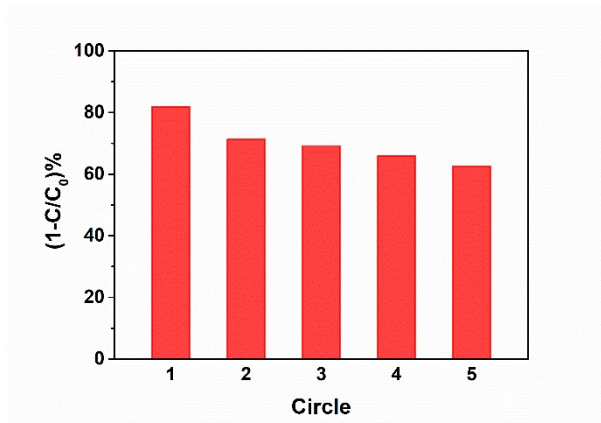

**Figure S7** Cycle test for 2-C-4-NP photodegradation of Fe-BOC in 60 min.

The percentage of the 2-chloro-4-nitrophenol photodegraded were tested to be 81%, 71%, 69%, 65%, and 62% after each cycle in 60 min.

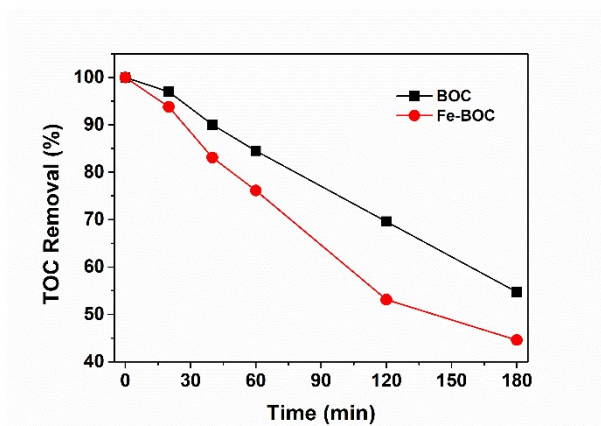

**Figure S8** TOC removal efficiency of the BOC and Fe-BOC.

The total organic carbon (TOC) removal efficiencies were 15.5% and 23.9% for BOC and Fe-BOC in 60 min, respectively. After 3 h, the TOC removal efficiency could reach to 55.5% for Fe-BOC.

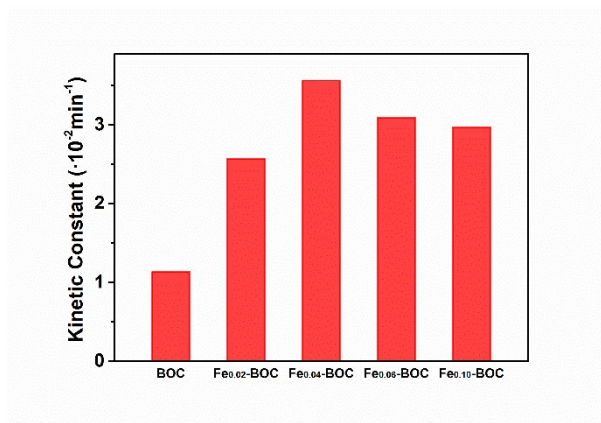

**Figure S9** 2-C-4-NP photodegradation activity of BiOCl and Fe-doped BiOCl with various concentration of Fe.

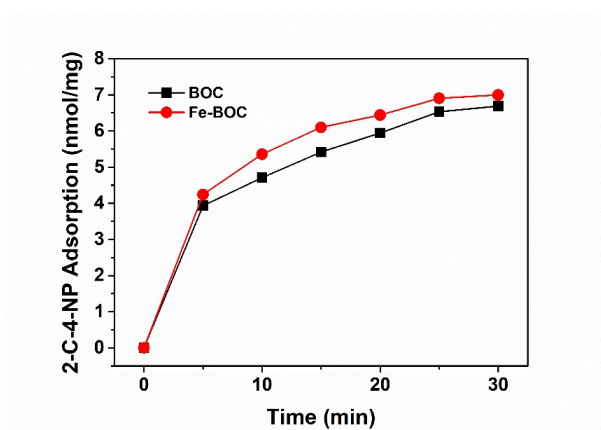

**Figure S10** Adsorption curves of 2-C-4-NP over BOC and Fe-BOC.

The amounts of adsorbed 2-C-4-NP were detected to be 6.68 and 6.99 nmol/mg for BOC and Fe-BOC, respectively.

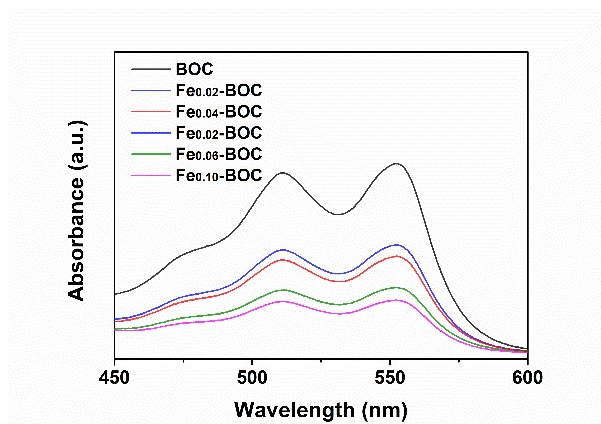

**Figure S11** Absorption spectra of DPD/POD-H<sub>2</sub>O<sub>2</sub> over BiOCl and other Fe-doped BiOCl samples.

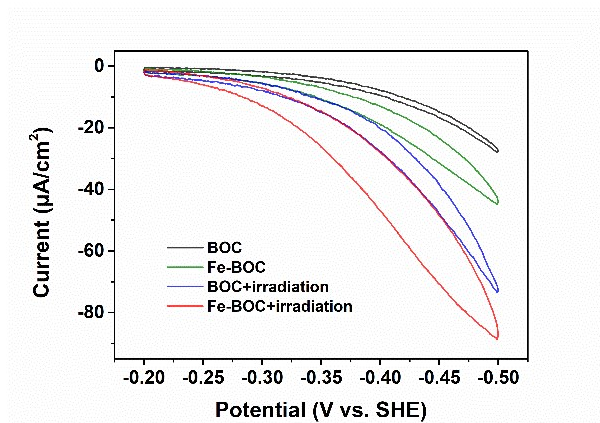

**Figure S12** CV curves of prepared BOC and Fe-BOC within and without simulated light irradiation.

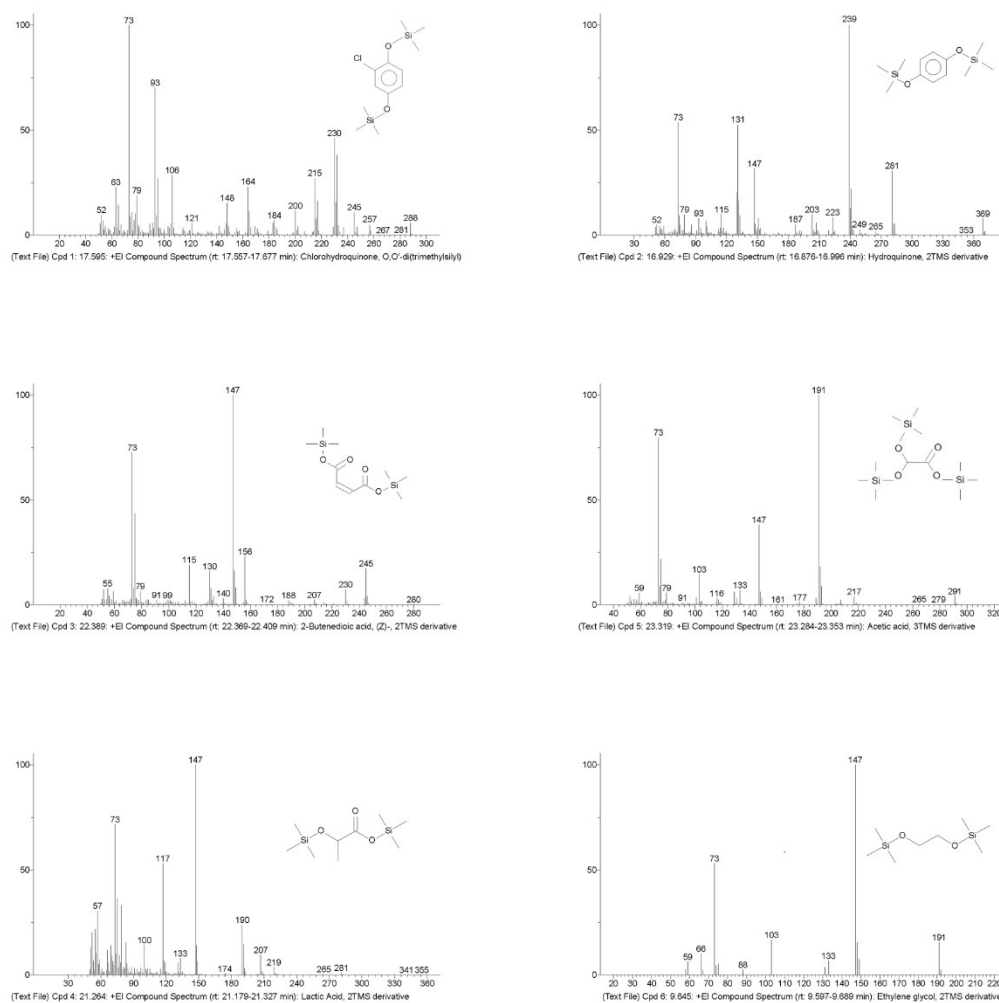

**Figure S13** Intermediate products detected by GC-MS with TMCS-HDMS derivatization.
